# Supplementary material for: Gadolinium Protects Arabidopsis thaliana against Botrytis cinerea through the Activation of JA/ET-Induced Defense Responses
Source: MDPI journal article supplement (doi:10.3390/ijms22094938), 2021-05-06
Supplement: s1 [file s1]

## **Supplementary Information Legends.**

**Supplementary Table 1.** GO enrichment analysis of differentially expressed genes commonly induced or repressed after Gd application (24 hpt) and during the interaction with *B. cinerea* (24 hpi).

**Supplementary Figure 1.** Gd does not affect germination rates, fresh nor dry weight. **(A)**. Mock-, Gd- or Ca-treated seedlings were transplanted to the soil and 30 days post transplanting the number of leaves were counted. *A. thaliana* seeds were incubated during 1 hour with distilled sterile water (Mock), 0.2 g l<sup>-1</sup> Ca or Gd and germinated under in-vitro conditions, 10 days post incubation germination rate **(B)**, fresh **(C)** and dry weight **(D)** were measured. Bars represent mean values ( $\pm$  SD) of three independent experiments (n=30 for each experiment). Different letters above each bar represent statistically significant differences according to the Scott-Knott test ( $p < 0.05$ ).

**Supplementary Figure 2.** Gd does not modify plant cuticle permeability. 4-week-old *A. thaliana* plants were treated with 0.2 g l<sup>-1</sup> Ca or Gd (24 hpt). **(A)** Leaves were placed in ethanol and the release of chlorophyll was followed over the indicated time points. The values represent mean of three independent samples ( $\pm$  SD). **(B)** A droplet of toluidine blue was placed on the leaf surface for 2 hours, then was rinsed away with water. The blue stain remains attached to the cell wall if the plant has a more permeable cuticle. **(C)** Leaves were bleached overnight in ethanol then stained with calcofluor white that binds to cellulose and viewed under UV light. Calcofluor staining to the leaf is indicative of a permeabilized cuticle. All the experiments were carried out three times with similar results, representative pictures are shown.

**Supplementary Figure 3.** MapMan pathway analysis of differentially expressed genes of **(A)** 24 hpt with 0.2 g l<sup>-1</sup> Gd and **(B)** afterwards infected with *B. cinerea* (24 hpi) compared to Ca-treated samples.

**Supplementary Data 1.** List of significantly differentially expressed genes 24 hpt. Genes names are from TAIR 10 annotation. Ca- and Gd-treated columns contain the FPKM values from RSEM analysis, from Ca- and Gd-treated *A. thaliana* samples, respectively. “Fold change” are normalized Log2 values. All the transcripts of this table have a p-value  $< 0.001$ . The genes analyzed on Figure 7 are highlighted in yellow.

**Supplementary Data 2.** List of significantly differentially expressed genes 24 hpi. Genes names are from TAIR 10 annotation. Ca- and Gd-treated columns contain the FPKM values from RSEM analysis, from Ca- and Gd-treated *A. thaliana* and infected with *B. cinerea* samples, respectively. “Fold change” are normalized Log2 values. All the transcripts of this table have a p-value  $< 0.001$ . The genes analyzed on Figure 7 are highlighted in yellow.
